**Longitudinal evolution of the transdiagnostic prodrome to severe mental disorders:  
a dynamic temporal network analysis informed by natural language processing and  
electronic health records**

Maite Arribas MSc<sup>1</sup>, Joseph M. Barnby PhD<sup>2,3,4</sup>, Rashmi Patel MD PhD<sup>5</sup>, Robert A. McCutcheon MD PhD<sup>6,7</sup>, Daisy Kornblum PhD<sup>8</sup>, Hitesh Shetty MSc<sup>8</sup>, Kamil Krakowski MSc<sup>1,9</sup>, Daniel Stahl PhD<sup>8,10</sup>, Nikolaos Koutsouleris MD<sup>11,12,13</sup>, Philip McGuire MD PhD<sup>6,7,14</sup>, Paolo Fusar-Poli MD PhD<sup>1,9,11,15\*</sup>, Dominic Oliver PhD<sup>1,6,7,14\*</sup>

\* Joint senior authorship

1 Early Psychosis: Interventions and Clinical-Detection (EPIC) Lab, Department of Psychosis Studies, Institute of Psychiatry, Psychology & Neuroscience, King's College London, London, UK

2 Social Computation and Cognitive Representation (SoCCR) Lab, Department of Psychology, Royal Holloway, University of London, London, UK

3 Cultural and Social Neuroscience Group, Institute of Psychiatry, Psychology, and Neuroscience, King's College London, University of London, London, UK

4 School of Psychiatry and Clinical Neuroscience, The University of Western Australia, Perth, Australia

5 Department of Psychological Medicine, Institute of Psychiatry, Psychology & Neuroscience, King's College London, London, UK

6 Department of Psychiatry, University of Oxford, Oxford, UK

7 NIHR Oxford Health Biomedical Research Centre, Oxford, UK

8 NIHR Maudsley Biomedical Research Centre, London, UK

9 Department of Brain and Behavioral Sciences, University of Pavia, Pavia, Italy

10 Department of Biostatistics and Health Informatics, Institute of Psychiatry, Psychology & Neuroscience, London, UK

11 Department of Psychiatry and Psychotherapy, Ludwig-Maximilian University, Munich, Germany

12 Max-Planck Institute of Psychiatry, Munich, Germany

13 Department of Psychosis Studies, Institute of Psychiatry, Psychology & Neuroscience, King's College London, London, UK

14 OPEN Early Detection Service, Oxford Health NHS Foundation Trust, Oxford, UK;

15 Outreach and Support in South-London (OASIS) service, South London and Maudsley (SLaM) NHS Foundation Trust, UK

Corresponding author:

Maite Arribas (maite.arribas@kcl.ac.uk)

Department of Psychosis Studies, Institute of Psychiatry, Psychology and Neuroscience, 5th Floor, 16 De Crespigny Park, London SE5 8AF, UK

Phone: 020 7848 0002

Abstract: 350/350

Word Count: 2,987/3,000 (max 3,000)

Figures: 4, Tables: 1 (max 5 in total)

**Keywords:** psychosis, bipolar, depression, network analysis, electronic health record, artificial intelligence, natural language processing, early detection, severe mental disorder, temporal network analysis

### **Key Points Count: 98/100**

**Question:** How does the dynamic evolution of the prodrome differ across severe mental disorder (SMD) diagnostic groups (unipolar mood disorders, bipolar mood disorders and psychotic disorders) in secondary mental healthcare?

**Findings:** This large temporal network analysis study (n=7,049) highlights a transdiagnostic overlap in the pattern of progression of prodromal symptoms of different SMD diagnostic groups in secondary mental healthcare.

**Meaning:** Transdiagnostic early detection services for SMD may be beneficial in extending the benefits of preventive psychiatry. We have identified prodromal symptoms that are central to SMD onset, which could be useful targets for preventive interventions to disrupt the progression of SMD.

## **ABSTRACT**

**Importance:** Modelling the prodrome to severe mental disorders (SMD), including unipolar mood disorders (UMD), bipolar mood disorders (BMD) and psychotic disorders (PSY), should consider both the evolution and interactions of symptoms and substance use (prodromal features) over time. Temporal network analysis can detect causal dependence between and within prodromal features by representing prodromal features as nodes, with their connections (edges) indicating the likelihood of one feature preceding the other. In SMD, node centrality could reveal insights into important prodromal features and potential intervention targets. Community analysis can identify commonly occurring feature groups to define SMD at-risk states.

**Objective:** To develop a global transdiagnostic SMD network of the temporal relationships between prodromal features, and to examine within-group differences with sub-networks specific to UMD, BMD and PSY

**Design:** Retrospective (2-year), real-world, electronic health records (EHR) cohort study. Validated natural language processing algorithms extracted the occurrence of 61 prodromal features every three months from two years to six months prior to SMD onset. To construct temporal networks of prodromal features, we employed generalized vector autoregression panel analysis, adjusting for covariates.

**Setting:** South London and Maudsley NHS Foundation Trust EHRs.

**Participants:** 7,049 individuals with an SMD diagnosis (UMD:2,306; BMD:817; PSY:3,926).

**Main Outcomes:** Edge weights (correlation coefficients,  $z$ ) in autocorrelative, unidirectional and bidirectional relationships. Centrality was calculated as the sum of connections leaving (out-centrality,  $c_{out}$ ) or entering (in-centrality,  $c_{in}$ ) a node. The three sub-networks (UMD, BMD, PSY) were compared using permutation analysis. Community analysis was performed using Spinglass.

**Results:** The SMD network was characterised by unidirectional positive relationships, with aggression ( $c_{out}=.082$ ) and tearfulness ( $c_{in}=.124$ ) as the most central features. The PSY sub-network showed few significant differences compared to UMD (3.9%) and BMD (1.6%), and UMD-BMD showed even fewer (0.4%). Two positive psychotic (delusional thinking-hallucinations-paranoia, and aggression-agitation-hostility) and one depressive community (guilt-poor insight-tearfulness) were the most common.

**Conclusions and Relevance:** This study represents the most extensive temporal network analysis conducted on the longitudinal interplay of SMD prodromal features. These findings provide further evidence to support transdiagnostic early detection services across SMD, refine assessments to detect individuals at risk and identify central features as potential intervention targets.

## 1. **BACKGROUND**

Severe mental disorders (SMD) include non-psychotic unipolar mood disorders (UMD), non-psychotic bipolar mood disorders (BMD) and psychotic disorders (PSY), and are characterised by high clinical, societal, familial and personal burden.<sup>1-3</sup> Electronic health records (EHRs) can provide an opportunity to examine prodromal symptoms contemporaneously, reducing recall bias and enriching our insight into symptom presentation during the prodrome.<sup>4</sup> This knowledge can help enhance specialised preventive care for people at-risk of emerging SMD.

Temporal network analysis, as an implementation of dynamic systems theory<sup>5</sup>, allows statistical modelling of the relationships between nodes (prodromal features) as edges within a dynamic network (e.g. prodrome) over time.<sup>6</sup> Weak, sparse networks are more modifiable, while strong, dense networks resist change<sup>7</sup>, needing intensive interventions to alter them<sup>8</sup> (e.g. preventing SMD onset). Edge estimates in temporal nodes suggest directed causality between features, potentially enhancing our understanding of SMD development.<sup>9</sup> Node centrality, representing connection strength in and out of a node,<sup>10</sup> may highlight the significance of a prodromal feature in the progression of the disorder and its potential as an intervention target.<sup>11-14</sup> Communities are subgroups of nodes which are more densely connected amongst each other than with nodes outside of the subgroup<sup>15</sup> and could help identify core prodromal connection pathways across SMD.<sup>16</sup>

Firstly, we aimed to develop a global transdiagnostic SMD network to quantify the temporal relationships between prodromal features. Secondly, we aimed to examine within-group differences by computing and comparing sub-networks specific to UMD, BMD and PSY.

## 2. **METHODS**

### 2.1. **Data Source**

Data were from the South London and Maudsley National Health Service Foundation Trust (SLaM). SLaM provides secondary mental healthcare across four socioeconomically diverse South London boroughs (eMethods 1). A Clinical Record Interactive Search (CRIS) tool was implemented in the EHR to facilitate research with full but anonymised clinical information.<sup>17</sup> CRIS has already been extensively validated in previous research studies.<sup>18–20</sup> CRIS received ethical approval as an anonymised dataset for secondary analyses from Oxfordshire REC C (Ref: 23/SC/0257).

### 2.2. **Study Design**

Retrospective (2-year), real-world, EHR cohort study (Figure 1). The 2 years were chosen to mirror the typical duration of care in clinical services for primary indicated prevention of SMD (72.4% provide care for 24 months or less).<sup>21</sup> The index date reflected the date of the first diagnosis within an individual's SMD group recorded in the EHR (index diagnosis, T-0mo, Figure 1). The antecedent date was defined by a data cut-off at 6 months before the index date (T-6mo), defining the antecedent period, to avoid overlap with the actual onset of SMD. The lookback period (Figure 1) was defined as the 1.5 years before the antecedent date (T-6mo). To minimise violations of the time invariance assumption imposed by network analyses,<sup>22</sup> we regularised the 1.5-year lookback period into six three-month follow-up intervals.

### 2.3. **Study Population**

All individuals accessing SLaM services between 1<sup>st</sup> January 2008 and 10<sup>th</sup> August 2021 and receiving a primary (i.e. not comorbid) ICD-10 index diagnosis of any SMD were eligible. SMD was defined as either UMD, BMD or PSY (operationalised as in eTable 1). Individuals with multiple SMD diagnoses were assigned the diagnosis of greatest severity (i.e. UMD<BMD<PSY).

Individuals with EHR entries (e.g. clinical notes and letters recorded in each month) recorded exclusively after the index date or exclusively in the antecedent period were excluded as they had no detectable prodrome. Individuals who only had empty EHR entries within the lookback period were also excluded, as well as those with EHR entries recorded within four or fewer follow-up intervals within the lookback period, as they did not have sufficient data to contribute to the fitted networks.

### 2.4. **Variables**

At index date, data were extracted from structured text on age, gender, self-assigned ethnicity (UK Office of National Statistics, eTable 2), ICD-10 diagnoses and prescription of antipsychotics, antidepressants, mood stabilisers and anxiolytics (see eTable 3 for medication classification details).

During the lookback period, data were extracted as binary variables on the occurrence (yes:1/no:0) of 61 natural language processing (NLP)-based prodromal features across each follow-up interval (FU 1-6; Figure 1). These NLP algorithms convert unstructured EHR information (i.e. free text) into structured quantifiable data.<sup>23</sup> NLP algorithms with precision  $\geq 80\%$  (mean=90%) were included (see eMethods 2 for further details on NLP algorithm development and validation, and eTable 4 for the final list of NLP algorithms employed).

Within each follow-up interval, the EHR entry frequency (number of entries) and length (total number of words recorded across all entries) were computed.

## **2.5. Statistical analysis**

All analyses were conducted in R (version 4.2.3) on a virtual machine (AMD EPYC 7763 64-Core Processor) in Ubuntu 22.04.1 operating system. All analysis code is publicly available on GitHub: [https://github.com/m-arribas/network\\_analysis.git](https://github.com/m-arribas/network_analysis.git).

### **2.5.1. Sociodemographic and Clinical Characteristics**

We computed descriptive analyses for sociodemographic variables at index date (age, gender, self-assigned ethnicity) as well as the proportion (N [%]) of individuals with specific ICD-10 diagnoses and prescription of antipsychotics, antidepressants, mood stabilisers and anxiolytics at index in UMD, BMD and PSY. A sensitivity analysis was completed to test for any sampling bias in the final population compared to excluded individuals (eMethods 3).

### **2.5.2. Network analysis**

As a primary analysis, we quantified a set of local network metrics in a transdiagnostic SMD network (hereby called “SMD network”) on the entire study population. In a secondary analysis, we repeated this on each SMD sub-sample separately (UMD, BMD, PSY), to compute three diagnosis-specific sub-networks (hereby called “sub-networks”). For each network (SMD network and three sub-networks), the following steps (pre-processing, network development and stability assessment) were repeated separately in each relevant dataset using a similar step-wise procedure to prior work modelling temporal features in psychopathology.<sup>24</sup>

Pre-processing and network development methods are detailed in eMethods 4-5. Importantly, during pre-processing, we controlled for a set of demographic, medication and clinical variables through linear regression (see eMethods 4) and used the resultant residuals in our networks to isolate prodromal feature variability over time. For each network (SMD network and three sub-networks), we extracted the temporal (within individuals), contemporaneous (relationships between nodes averaged over time and averaged across the sample), and between-individuals subject matrices. From each matrix, the edge weights were estimated as correlation coefficients ( $r$ ), and categorised as autocorrelative, unidirectional, and bidirectional. Degree centrality measures were extracted from each graph. Detailed definitions of each measure are presented in eMethods 4.

To evaluate the robustness of the edge weight estimates and to avoid overfitting in our networks, we computed the stability of edges within each network using bootstrapping procedures: over 250 iterations, 25% of the sample was randomly held out and the full model refitted on the remaining 75% of participants (following standard methods).<sup>25</sup> Within each iteration, the selected data was pre-processed in the same manner as in the full model to control for errors and variance within the data cleaning and scaling process. The averaged edge weights and 95% CIs over all 250 iterations were retained and reported. All edges with 95% CIs crossing zero were forced to 0.

### **2.5.3. Permutation analysis**

To test for statistically significant differences in the temporal, contemporaneous, and between-subject relationships across the three sub-networks (UMD, BMD, PSY) we conducted permutation analyses<sup>26</sup> (eMethods 6). Observed differences in edge weights (from

the actual dataset) and corrected p-values (from the permutation analysis) were reported and visualised with heatmaps.

#### **2.5.4. Community analysis**

We conducted community analyses using the Spinglass algorithm<sup>27</sup> (eMethods 7) within the SMD network and three sub-networks (UMD, BMD, PSY) from the permutation analysis. For each network, a heatmap was produced to display the probability of node-node co-occurrence (covariance) within community structures, and the three most occurring communities were visualised.



### 3. RESULTS

#### 3.1. Study Population

The final study population (n=7,049, Table 1; eTable 5-6) had EHR entries with more than four follow-up intervals (mean number of intervals [SD]=5.69 [0.46]) within the lookback period (eFigure 1). Included participants were similar to excluded participants in terms of sociodemographics and clinical characteristics (eResults 1). Eight participants were excluded as the imputation method was unable to converge on stable approximations.

#### 3.2. Primary Analysis (SMD network)

Out of the 61 NLP-derived prodromal features, 38 displayed near-zero variance and were excluded, leaving 23 features for the analyses (eTable 7, eFigure 2). A saturated model (a densely connected network with all available edges) was fitted with the 23 features at 6 follow-up intervals (Figure 3A). This network demonstrated excellent fit (RMSEA=.0091 [95%CI: .0088, .0094];  $X^2(8625)=13650$ ,  $p<.0001$ ; CFI=.97; TLI=.97) and had better fit than a sparse network (pruned edges) ( $\Delta X^2(733)=2734.10$ ,  $p<.0001$ ). The model showed high recoverability (eResults 2) and robustness (see Figure 3B and eTables 8-9 for actual model and bootstrapped estimates).

The strongest autocorrelation was observed for tearfulness (correlation coefficient,  $z=.10$ ), with all the other autocorrelations between 0.05-0.10 (Figure 3A). The most prominent unidirectional relationships were positive: irritability-aggression ( $z_{12}=.03$ ), irritability-agitation ( $z_{12}=.03$ ), hallucinations-disturbed sleep ( $z_{12}=.03$ ) and mood instability-tearfulness ( $z_{12}=.03$ ). All other unidirectional relationships were  $|z_{12}|<.03$ .

With respect to bidirectional relationships, positively recurring pairs were observed between aggression-hostility ( $z_{12}=.04$ ,  $z_{21}=.03$ ), delusional thinking-hallucinations ( $z_{12}=.04$ ,  $z_{21}=.03$ ), aggression-agitation ( $z_{12}=.03$ ,  $z_{21}=.03$ ) and delusional thinking-hostility ( $z_{12}=.02$ ,  $z_{21}=.03$ ).

Considering centrality (Figure 3C), aggression ( $c_{out}=.098$ ), hostility ( $c_{out}=.082$ ), and hallucinations ( $c_{out}=.081$ ) had the strongest out-centrality, whereas tearfulness ( $c_{in}=.124$ ), aggression ( $c_{in}=.09$ ) and delusional thinking ( $c_{in}=.085$ ) had the strongest in-centrality (eTable 10).

Results and visualisations for the contemporaneous and between-subject relationships of nodes are presented in eResults 3 and eFigure 3. See eTable 12 for actual model and bootstrapped estimates.

#### 3.3 Secondary Analysis (sub-networks)

Out of the 61 NLP-derived prodromal features, after applying the relevant exclusions within each sub-sample, 21 features were included for the UMD network, 19 for BMD and 24 for PSY (eMethods 8). A saturated model was fitted with the relevant features at 6 follow-up intervals in each sub-sample (UMD, BMD, PSY) (Figure 3). Similarly to the primary analysis, saturated networks showed excellent fit and better fit than sparse models for the three networks (UMD:  $\Delta X^2(687)=1737$ ,  $p<.0001$ ; BMD:  $\Delta X^2(606)=1547$ ,  $p<.0001$ ; PSY:  $\Delta X^2(856)=2961$ ,  $p<.0001$ ). Further model fit results, including recoverability (eResults 4), and bootstrapped estimates (eTable 11, eFigure 4) can be found in the Supplement.

Considering centrality, in the UMD sub-network, weight loss ( $c_{in}=.140$ ), aggression ( $c_{in}=.128$ ) and suicidality ( $c_{in}=.106$ ) had the strongest in-centrality, whereas tobacco use



( $c_{out}=.105$ ), mood instability ( $c_{out}=.103$ ) and poor motivation ( $c_{out}=.092$ ), had the strongest out-centrality (eTable 13A). In the BMD sub-network, elation ( $c_{in}=.176$ ), irritability ( $c_{in}=.157$ ) and tobacco use ( $c_{in}=.152$ ), had the strongest in-centrality, whereas elation ( $c_{out}=.165$ ), irritability ( $c_{out}=.163$ ) and guilt ( $c_{out}=.143$ ) had the strongest out-centrality (eTable 13B). In the PSY sub-network, agitation ( $c_{in}=.115$ ), aggression ( $c_{in}=.078$ ) and arousal ( $c_{in}=.072$ ), had the strongest in-centrality, whereas aggression ( $c_{out}=.143$ ), hostility ( $c_{out}=.135$ ) and hallucinations ( $c_{out}=.104$ ) had the strongest out-centrality (eTable 13C).

Edge weight results for each sub-network are reported in eResults 5. Moreover, results and visualisations for the contemporaneous and between-subject relationships of nodes for all sub-networks are in eResults 6. See eTable 12 for the actual model and bootstrapped estimates.

### 3.4 Permutation Analysis

The final nodes for permutation analysis are found in eMethods 9, with the actual model estimates in eTable 14. The histograms of permuted edge weights exhibited a normal (bell-shaped), zero-centred curve, indicating that edge weights that lay outside of the null distribution following permutation testing are likely to be a true positive difference between networks. Out of all possible edge weight comparisons, few of them were significantly different: UMD-PSY (3.9%), followed by BMD-PSY (1.6%) and then UMD-BMD (0.4%).

UMD showed a significantly stronger edge weight from irritability to tobacco use compared to BMD ( $z_{UMD-BMD}=.059$ ,  $p_{permuted}<.001$ ). In addition, the following edge weights were significantly stronger compared to PSY: cannabis use (autocorrelation) ( $z_{UMD-PSY}=.051$ ,  $p_{permuted}<.001$ ), agitation-suicidality ( $z_{UMD-PSY}=.048$ ,  $p_{permuted}<.001$ ), tobacco use-suicidality ( $z_{UMD-PSY}=.038$ ,  $p_{permuted}<.001$ ), mood instability-aggression ( $z_{UMD-PSY}=.035$ ,  $p_{permuted}<.001$ ), suicidality-hallucinations ( $z_{UMD-PSY}=.034$ ,  $p_{permuted}<.001$ ) and cannabis-suicidality ( $z_{UMD-PSY}=.033$ ,  $p_{permuted}<.001$ ) (eFigure 5).

BMD did not show any edge weights that were significantly stronger than UMD, and only one edge weight was stronger compared to PSY (from tearfulness-cannabis use) ( $z_{BMD-PSY}=.049$ ,  $p_{permuted}<.001$ ) (eFigure 5).

PSY showed significantly stronger edge weights compared to UMD for the following edges: hallucinations-paranoia ( $z_{PSY-UMD}=.048$ ,  $p_{permuted}<.001$ ), paranoia (autocorrelation) ( $z_{PSY-UMD}=.048$ ,  $p_{permuted}<.001$ ), tobacco use (autocorrelation) ( $z_{PSY-UMD}=.045$ ,  $p_{permuted}<.001$ ) and paranoia-disturbed sleep ( $z_{PSY-UMD}=.033$ ,  $p_{permuted}<.001$ ). PSY also showed significantly stronger edge weights compared to BMD for the edges: hallucinations (all)-disturbed sleep ( $z_{PSY-BMD}=.072$ ,  $p_{permuted}<.001$ ), irritability-tobacco use ( $z_{PSY-BMD}=.070$ ,  $p_{permuted}<.001$ ) and disturbed sleep-paranoia ( $z_{PSY-BMD}=.053$ ,  $p_{permuted}<.001$ ) (eFigure 5).

Histograms showing null distributions for significant temporal comparisons are in eFigure 6, with the results from the contemporaneous and between-subject matrices in eFigures 7-8.

### 3.5 Community analysis

Heatmaps of node-node covariance across communities are displayed in Figure 4. The most commonly occurring communities for the SMD network were: delusional thinking-hallucinations-paranoia (occurs in 6% of 1000 iterations of the Spinglass algorithm), aggression-agitation-hostility (2.9%), and guilt-poor insight-tearfulness (1.9%). For UMD:

cognitive impairment-disturbed sleep-hallucinations-poor concentration-poor motivation-tearfulness (22.7%), aggression-anxiety-mood instability, and cannabis use-poor insight-suicidality-tobacco use (18.6%). For BMD: anxiety-mood instability-tearfulness-tobacco use (45.6%), aggression-agitation-cognitive impairment-irritability-paranoia (24.5%) and, poor concentration-poor insight-poor motivation-suicidality (23.3%). For PSY: poor insight-poor motivation-suicidality (38.9%), aggression-agitation-poor concentration (11.6%), and anxiety-disturbed sleep-hallucinations (9.6%).

## **4. DISCUSSION**

This study represents the most extensive temporal network analysis to date modelling the temporal dynamics between prodromal features in SMD, with respect to both the breadth of features and the large sample.

First, our findings provide evidence for the existence of dynamic relationships between prodromal features which are transdiagnostic across SMD (in the context of secondary mental health care). Understanding these dynamics can be used to identify risk states to prevent the progression to SMD onset.<sup>28</sup> We identified two positive psychotic communities (delusional thinking-hallucinations-paranoia, and aggression-agitation-hostility) and one depressive community (guilt-poor insight-tearfulness) as the most common pathways leading to SMD onset<sup>16</sup>. Furthermore, we found minimal differences among diagnosis-specific sub-networks, highlighting substantial overlap in the dynamic progression of prodromal stages of UMD, BMD and PSY. This finding aligns with previous findings of transdiagnostic overlap in duration, first presentation and frequencies of prodromal features across SMD,<sup>29</sup> and extends them by showing transdiagnostic temporal and causal relationships between these features. These findings support the emergence of transdiagnostic early detection strategies that have previously been conceptualised in the clinical staging model<sup>30-34</sup> and the Clinical High At Risk Mental State (CHARMS<sup>35</sup>) criteria, which have started to be implemented clinically.<sup>35-39</sup>

Second, insights from our diagnosis-specific sub-networks might inform the development and refinement of at-risk psychometric tools. For example, CHARMS criteria currently use assessments to define UMD and BMD risk states that were developed for full threshold disorders,<sup>40,41</sup> which could be refined to improve specificity for at-risk states<sup>36</sup>. In our network models, communities represent commonly occurring dynamic pathways of prodromal features that could inform these refinements. For example, suicidality was consistently predicted by poor insight in the most commonly occurring communities across all sub-networks. Specifically, cannabis and tobacco use also predicted suicidality in UMD, whereas for BMD and PSY suicidality predicted poor motivation. Moreover, irritability was part of a diagnosis-specific community in BMD along with paranoia, aggression, agitation and cognitive impairment. This finding aligns with hypomanic symptoms as diagnostic risk factors<sup>42</sup> for psychometric instruments<sup>43-45</sup> for bipolar at-risk<sup>46</sup>. Similarly, assessments to detect individuals at clinical high risk for psychosis (CHR-P) have low specificity<sup>47</sup> and may be improved through additional features from our analyses. Echoing our earlier findings,<sup>29</sup> PSY exhibited the most distinctive pattern of relationships between prodromal features, with stronger connections compared to both UMD and BMD in symptom pairs relating to hallucinations, paranoia, tobacco use and disturbed sleep. The prominence of positive symptoms in PSY affirms the relevance of these assessments,<sup>48-50</sup> which primarily consider these symptoms. We further identified that hallucinations and anxiety were linked to disturbed sleep in PSY in a diagnosis-specific community. Sleep issues have already been reported in the literature in CHR-P individuals<sup>51,52</sup> and people with psychosis<sup>53,54</sup>. Our findings extend this by providing evidence that sleep disturbances in the PSY prodrome appear to be a consequence of hallucinations, which may inform early detection strategies.

Third, our networks were densely connected with predominantly positive associations between prodromal features; presenting with one feature typically predicts the emergence, rather than absence, of the same or another feature in the future. As a result of this sequential symptom build-up, interventions need to target highly central features to disrupt the SMD

prodrome network and reduce the risk of further prodromal features emerging. We have identified features with high centrality that represent potential preventive intervention targets. Suicidality was highly central in the UMD prodrome, highlighting its importance during the prodrome, despite being less prominent than in the full disorder.<sup>55</sup> Manic symptoms, such as elation and irritability, were highly central in BMD. Interventions targeting these symptoms may halt the progression of these disorders. Aggression and agitation were central features and part of a diagnosis-specific community in PSY. However, this finding requires careful interpretation as our NLP algorithm for aggression does not distinguish between forms of violence directed to others or oneself, and individuals with PSY are more likely to be victims of violence than the general population.<sup>2,56</sup>

This study, while comprehensive, has several limitations. First, the network features are prodromal as they are detectable in secondary care before these diagnoses. However, despite our extensive range of prodromal, sociodemographic and treatment variables, there may still be unaccounted factors that influence the temporal evolution of SMD prodromes, such as functioning.<sup>57</sup> Future work should map symptom trajectories to identify confounding factors affecting symptom emergence in extensive networks such as ours. Second, to reduce the missingness in the dataset, we used a relatively short look-back period. However, this two-year period before disorder onset aligns with the typical duration of clinical care for at-risk individuals.<sup>58</sup> Third, the final population presents a selection bias towards those receiving more frequent secondary care, limiting generalizability. Similarly, specific features, such as disorganised symptoms, may be underrepresented due to the need for consistent clinical visits. However, there were minimal differences between included and excluded individuals, in terms of demographics, clinical variables and presenting symptoms. EHR and NLP-related limitations are discussed in eLimitations 1.

Overall, our study highlights the presence of a detectable transdiagnostic SMD prodrome by modelling the evolution of symptoms and substance use over time. Our findings support the potential for broader transdiagnostic early detection services for SMD that provide preventive care to individuals at-risk and a research platform for investigating putative interventions.

## **Funding**

MA is supported by the UK Medical Research Council (MR/N013700/1) and King's College London member of the MRC Doctoral Training Partnership in Biomedical Sciences. JMB has received funding from the Wellcome Trust (WT228268/Z/23/Z) and is supported by the FENS-Kavli Network of Excellence (FKNE). RP has received funding from an NIHR Advanced Fellowship (NIHR301690) and a Medical Research Council (MRC) Health Data Research UK Fellowship (MR/S003118/1). PFP is supported by #NEXTGENERATIONEU (NGEU), funded by the Ministry of University and Research (MUR), National Recovery and Resilience Plan (NRRP), project MNESYS (PE0000006) – A Multiscale integrated approach to the study of the nervous system in health and disease (DN. 1553 11.10.2022).

## **Data Sharing Statement**

The data accessed by CRIS remain within an NHS firewall and governance is provided by a patient-led oversight committee. Subject to these conditions, data access is encouraged and those interested should contact Robert Stewart ([robert.stewart@kcl.ac.uk](mailto:robert.stewart@kcl.ac.uk)), CRIS academic lead. Further details regarding the CRIS platform can be found elsewhere<sup>17</sup>. There is no permission for data sharing. Covariance matrices to estimate networks and all analysis code are available on GitHub: [https://github.com/m-arribas/network\\_analysis.git](https://github.com/m-arribas/network_analysis.git).

## **Ethics committee approval**

Permissions for the study were granted by the Oxfordshire Research Ethics Committee C; because the data set comprised deidentified data, informed consent was not required<sup>17</sup>.

## **Authors' contribution**

MA, JMB and DO conceptualised the study. DO and PFP supervised the study. MA, JMB and DO ran the statistical analyses. All authors drafted, edited, and approved the final version of the manuscript.

## **Conflict of interest**

MA has been employed by F. Hoffmann-La Roche AG outside of the current study. RP has received grant funding from Janssen, and consulting fees from Holmusk, Akriova Health, Columbia Data Analytics, Boehringer Ingelheim and Otsuka. PFP has received research funds or personal fees from Lundbeck, Angelini, Menarini, Sunovion, Boehringer Ingelheim, Mindstrong, Proxymm Science, outside the current study.

**Table 1.** Demographics and medication variables at index of final study population (N=7,049). Continuous variables are represented by mean (SD), categorical variables are represented by count (frequency).

| <b>Characteristic</b>   | <b>Whole sample, N=7,049</b> | <b>UMD, N = 2,306</b> | <b>BMD, N = 817</b> | <b>PSY, N = 3,926</b> |
|-------------------------|------------------------------|-----------------------|---------------------|-----------------------|
| <b>Age</b>              | 42.9 (16.4)                  | 42.9 (18.6)           | 43.8 (15.5)         | 42.8 (15.1)           |
| <b>Gender</b>           |                              |                       |                     |                       |
| Female                  | 3,669 (52)                   | 1,471 (64)            | 524 (64)            | 1,674 (43)            |
| Male                    | 3,374 (48)                   | 830 (36)              | 293 (36)            | 2,251 (57)            |
| missing                 | 1 (<0.1)                     | 0 (0)                 | 0 (0)               | 1 (<0.1)              |
| Other                   | 5 (<0.1)                     | 5 (0.2)               | 0 (0)               | 0 (0)                 |
| <b>Ethnicity</b>        |                              |                       |                     |                       |
| White                   | 3,848 (55)                   | 1,517 (66)            | 566 (69)            | 1,765 (45)            |
| Black                   | 2,064 (29)                   | 375 (16)              | 126 (15)            | 1,563 (40)            |
| Other                   | 257 (3.6)                    | 97 (4.2)              | 27 (3.3)            | 133 (3.4)             |
| Asian                   | 503 (7.1)                    | 150 (6.5)             | 55 (6.7)            | 298 (7.6)             |
| Mixed                   | 239 (3.4)                    | 90 (3.9)              | 28 (3.4)            | 121 (3.1)             |
| missing                 | 138 (2.0)                    | 77 (3.3)              | 15 (1.8)            | 46 (1.2)              |
| <b>Antidepressants</b>  | 2,978 (42)                   | 1,206 (52)            | 350 (43)            | 1,422 (36)            |
| <b>Mood stabilisers</b> | 1,186 (17)                   | 154 (6.7)             | 428 (52)            | 604 (15)              |
| <b>Anxiolytics</b>      | 1,892 (27)                   | 472 (20)              | 278 (34)            | 1,142 (29)            |
| <b>Antipsychotics</b>   | 3,798 (54)                   | 390 (17)              | 463 (57)            | 2,945 (75)            |

## References

1. Estradé A, Onwumere J, Venables J, et al. The Lived Experiences of Family Members and Carers of People with Psychosis: A Bottom-Up Review Co-Written by Experts by Experience and Academics. *Psychopathology*. Published online January 23, 2023:1-12. doi:10.1159/000528513
2. Fusar-Poli P, Estradé A, Stanghellini G, et al. The lived experience of psychosis: a bottom-up review co-written by experts by experience and academics. *World Psychiatry*. 2022;21(2):168-188. doi:10.1002/wps.20959
3. Fusar-Poli P, Estradé A, Stanghellini G, et al. The lived experience of depression: a bottom-up review co-written by experts by experience and academics. *World Psychiatry*. 2023;22(3):352-365. doi:10.1002/wps.21111
4. Oliver D, Arribas M, Perry BI, et al. USING ELECTRONIC HEALTH RECORDS TO FACILITATE PRECISION PSYCHIATRY. *Biol Psychiatry*. Published online February 24, 2024:S0006-3223(24)01107-7. doi:10.1016/j.biopsych.2024.02.1006
5. Borsboom D, Deserno MK, Rhemtulla M, et al. Network analysis of multivariate data in psychological science. *Nat Rev Methods Primers*. 2021;1(1):1-18. doi:10.1038/s43586-021-00055-w
6. Ebrahimi OV, Borsboom D, Hoekstra RHA, et al. Towards precision in the diagnostic profiling of patients: leveraging symptom dynamics as a clinical characterisation dimension in the assessment of major depressive disorder. *The British Journal of Psychiatry*. Published online April 8, 2024:1-7. doi:10.1192/bjp.2024.19
7. Wichers M, Wigman JTW, Myin-Germeys I. Micro-level affect dynamics in psychopathology viewed from complex dynamical system theory. *Emotion Review*. 2015;7:362-367. doi:10.1177/1754073915590623
8. Kuppens P, Allen NB, Sheeber LB. Emotional inertia and psychological maladjustment. *Psychol Sci*. 2010;21(7):984-991. doi:10.1177/0956797610372634
9. Epskamp S, van Borkulo CD, van der Veen DC, et al. Personalized Network Modeling in Psychopathology: The Importance of Contemporaneous and Temporal Connections. *Clinical Psychological Science*. 2018;6(3):416-427. doi:10.1177/2167702617744325
10. Levine SZ, Leucht S. Identifying a system of predominant negative symptoms: Network analysis of three randomized clinical trials. *Schizophr Res*. 2016;178(1-3):17-22. doi:10.1016/j.schres.2016.09.002
11. McNally RJ. Can network analysis transform psychopathology? *Behav Res Ther*. 2016;86:95-104. doi:10.1016/j.brat.2016.06.006
12. Tomba E, Bech P. Clinimetrics and clinical psychometrics: macro- and micro-analysis. *Psychother Psychosom*. 2012;81(6):333-343. doi:10.1159/000341757
13. van Borkulo C, Boschloo L, Borsboom D, Penninx BWJH, Waldorp LJ, Schoevers RA. Association of Symptom Network Structure With the Course of [corrected] Depression. *JAMA Psychiatry*. 2015;72(12):1219-1226. doi:10.1001/jamapsychiatry.2015.2079



14. Madhoo M, Levine SZ. Network analysis of the Quick Inventory of Depressive Symptomatology: Reanalysis of the STAR\*D clinical trial. *Eur Neuropsychopharmacol.* 2016;26(11):1768-1774. doi:10.1016/j.euroneuro.2016.09.368
15. Yang Z, Algesheimer R, Tessone CJ. A Comparative Analysis of Community Detection Algorithms on Artificial Networks. *Sci Rep.* 2016;6(1):30750. doi:10.1038/srep30750
16. Blanken TF, Deserno MK, Dalege J, et al. The role of stabilizing and communicating symptoms given overlapping communities in psychopathology networks. *Sci Rep.* 2018;8(1):5854. doi:10.1038/s41598-018-24224-2
17. Stewart R, Soremekun M, Perera G, et al. The South London and Maudsley NHS Foundation Trust Biomedical Research Centre (SLAM BRC) case register: development and descriptive data. *BMC Psychiatry.* 2009;9(1):51. doi:10.1186/1471-244X-9-51
18. Roberts E, Wessely S, Chalder T, Chang CK, Hotopf M. Mortality of people with chronic fatigue syndrome: a retrospective cohort study in England and Wales from the South London and Maudsley NHS Foundation Trust Biomedical Research Centre (SLaM BRC) Clinical Record Interactive Search (CRIS) Register. *Lancet.* 2016;387(10028):1638-1643. doi:10.1016/S0140-6736(15)01223-4
19. Oram S, Khondoker M, Abas M, Broadbent M, Howard LM. Characteristics of trafficked adults and children with severe mental illness: a historical cohort study. *Lancet Psychiatry.* 2015;2(12):1084-1091. doi:10.1016/S2215-0366(15)00290-4
20. Fusar-Poli P, Rutigliano G, Stahl D, et al. Deconstructing Pretest Risk Enrichment to Optimize Prediction of Psychosis in Individuals at Clinical High Risk. *JAMA Psychiatry.* 2016;73(12):1260-1267. doi:10.1001/jamapsychiatry.2016.2707
21. Salazar de Pablo G, Estradé A, Cutroni M, Andlauer O, Fusar-Poli P. Establishing a clinical service to prevent psychosis: What, how and when? Systematic review. *Transl Psychiatry.* 2021;11(1):43. doi:10.1038/s41398-020-01165-x
22. Epskamp S, Waldorp LJ, Möttus R, Borsboom D. The Gaussian Graphical Model in Cross-Sectional and Time-Series Data. *Multivariate Behav Res.* 2018;53(4):453-480. doi:10.1080/00273171.2018.1454823
23. Jackson RG, Patel R, Jayatilleke N, et al. Natural language processing to extract symptoms of severe mental illness from clinical text: the Clinical Record Interactive Search Comprehensive Data Extraction (CRIS-CODE) project. *BMJ Open.* 2017;7(1):e012012. doi:10.1136/bmjopen-2016-012012
24. Barnby JM, Haslbeck JMB, Rosen C, Harrow M. Modelling the Longitudinal Dynamics of Paranoia in Psychosis: A Temporal Network Analysis Over 20 Years. Published online January 9, 2023:2023.01.06.23284268. doi:10.1101/2023.01.06.23284268
25. Epskamp S, Borsboom D, Fried EI. Estimating psychological networks and their accuracy: A tutorial paper. *Behav Res.* 2018;50(1):195-212. doi:10.3758/s13428-017-0862-1
26. Fredrickson MM, Chen Y. Permutation and randomization tests for network analysis. *Social Networks.* 2019;59:171-183. doi:10.1016/j.socnet.2019.08.001

27. cluster\_spinglass function - RDocumentation. Accessed April 9, 2024. [https://www.rdocumentation.org/packages/igraph/versions/1.2.5/topics/cluster\\_spinglass](https://www.rdocumentation.org/packages/igraph/versions/1.2.5/topics/cluster_spinglass)
28. McGorry PD, Mei C. Clinical Staging for Youth Mental Disorders: Progress in Reforming Diagnosis and Clinical Care. *Annual Review of Developmental Psychology*. 2021;3(Volume 3, 2021):15-39. doi:10.1146/annurev-devpsych-050620-030405
29. Arribas M, Oliver D, Patel R, et al. A TRANSDIAGNOSTIC PRODROME FOR SEVERE MENTAL DISORDERS: AN ELECTRONIC HEALTH RECORD STUDY. (*in review*).
30. Uhlhaas PJ, Davey CG, Mehta UM, et al. Towards a youth mental health paradigm: a perspective and roadmap. *Mol Psychiatry*. Published online August 14, 2023:1-11. doi:10.1038/s41380-023-02202-z
31. Shah JL, Scott J, McGorry PD, et al. Transdiagnostic clinical staging in youth mental health: a first international consensus statement. *World Psychiatry*. 2020;19(2):233-242. doi:10.1002/wps.20745
32. Shah JL. Bringing Clinical Staging to Youth Mental Health: From Concept to Operationalization (and Back Again). *JAMA Psychiatry*. 2019;76(11):1121-1123. doi:10.1001/jamapsychiatry.2019.2003
33. Shah JL, Jones N, van Os J, McGorry PD, Gülöksüz S. Early intervention service systems for youth mental health: integrating pluripotentiality, clinical staging, and transdiagnostic lessons from early psychosis. *Lancet Psychiatry*. 2022;9(5):413-422. doi:10.1016/S2215-0366(21)00467-3
34. McGorry PD, Hartmann JA, Spooner R, Nelson B. Beyond the “at risk mental state” concept: transitioning to transdiagnostic psychiatry. *World Psychiatry*. 2018;17(2):133-142. doi:10.1002/wps.20514
35. Hartmann JA, Nelson B, Spooner R, et al. Broad clinical high-risk mental state (CHARMS): Methodology of a cohort study validating criteria for pluripotent risk. *Early Interv Psychiatry*. 2019;13(3):379-386. doi:10.1111/eip.12483
36. Iorfino F, Scott EM, Carpenter JS, et al. Clinical Stage Transitions in Persons Aged 12 to 25 Years Presenting to Early Intervention Mental Health Services With Anxiety, Mood, and Psychotic Disorders. *JAMA Psychiatry*. 2019;76(11):1167-1175. doi:10.1001/jamapsychiatry.2019.2360
37. Carpenter JS, Scott J, Iorfino F, et al. Predicting the emergence of full-threshold bipolar I, bipolar II and psychotic disorders in young people presenting to early intervention mental health services. *Psychological Medicine*. 2022;52(10):1990-2000. doi:10.1017/S0033291720003840
38. Hartmann JA, McGorry PD, Destree L, et al. Pluripotential Risk and Clinical Staging: Theoretical Considerations and Preliminary Data From a Transdiagnostic Risk Identification Approach. *Front Psychiatry*. 2020;11:553578. doi:10.3389/fpsyt.2020.553578

39. Destrée L, McGorry P, Chanen A, et al. Transdiagnostic risk identification: A validation study of the Clinical High At Risk Mental State (CHARMS) criteria. *Psychiatry Research*. 2024;333:115745. doi:10.1016/j.psychres.2024.115745
40. Association AP. *Understanding Mental Disorders: Your Guide to DSM-5®*. American Psychiatric Pub; 2015.
41. Rush AJ, Trivedi MH, Ibrahim HM, et al. The 16-Item quick inventory of depressive symptomatology (QIDS), clinician rating (QIDS-C), and self-report (QIDS-SR): a psychometric evaluation in patients with chronic major depression. *Biological Psychiatry*. 2003;54(5):573-583. doi:10.1016/S0006-3223(02)01866-8
42. Axelson D, Goldstein B, Goldstein T, et al. Diagnostic Precursors to Bipolar Disorder in Offspring of Parents With Bipolar Disorder: A Longitudinal Study. *AJP*. 2015;172(7):638-646. doi:10.1176/appi.ajp.2014.14010035
43. Correll CU, Olvet DM, Auther AM, et al. The Bipolar Prodrome Symptom Interview and Scale–Prospective (BPSS-P): description and validation in a psychiatric sample and healthy controls. *Bipolar Disorders*. 2014;16(5):505-522. doi:10.1111/bdi.12209
44. Fusar-Poli P, De Micheli A, Rocchetti M, et al. Semistructured Interview for Bipolar At Risk States (SIBARS). *Psychiatry Res*. 2018;264:302-309. doi:10.1016/j.psychres.2018.03.074
45. Leopold K, Ritter P, Correll CU, et al. Risk constellations prior to the development of bipolar disorders: rationale of a new risk assessment tool. *J Affect Disord*. 2012;136(3):1000-1010. doi:10.1016/j.jad.2011.06.043
46. Bechdolf A, Nelson B, Cotton SM, et al. A preliminary evaluation of the validity of at-risk criteria for bipolar disorders in help-seeking adolescents and young adults. *J Affect Disord*. 2010;127(1-3):316-320. doi:10.1016/j.jad.2010.06.016
47. Oliver D, Arribas M, Radua J, et al. Prognostic accuracy and clinical utility of psychometric instruments for individuals at clinical high-risk of psychosis: a systematic review and meta-analysis. *Mol Psychiatry*. 2022;27(9):3670-3678. doi:10.1038/s41380-022-01611-w
48. Yung AR, Yung AR, Pan Yuen H, et al. Mapping the Onset of Psychosis: The Comprehensive Assessment of At-Risk Mental States. *Aust N Z J Psychiatry*. 2005;39(11-12):964-971. doi:10.1080/j.1440-1614.2005.01714.x
49. McGlashan T, Walsh B, Woods S. *The Psychosis-Risk Syndrome: Handbook for Diagnosis and Follow-Up*. Oxford University Press, USA; 2010.
50. Addington J, Woods SW, Yung AR, Calkins ME, Fusar-Poli P. Harmonizing the structured interview for psychosis-risk syndromes (SIPS) and the comprehensive assessment of at-risk mental states (CAARMS): An initial approach. *Early Intervention in Psychiatry*. 2024;18(4):248-254. doi:10.1111/eip.13401
51. Poe SL, Brucato G, Bruno N, et al. Sleep disturbances in individuals at clinical high risk for psychosis. *Psychiatry Res*. 2017;249:240-243. doi:10.1016/j.psychres.2016.12.029

52. Tan HY, Ang YG. First-episode psychosis in the military: a comparative study of prodromal symptoms. *Aust N Z J Psychiatry*. 2001;35(4):512-519. doi:10.1046/j.1440-1614.2001.00912.x
53. Cohrs S. Sleep disturbances in patients with schizophrenia: impact and effect of antipsychotics. *CNS Drugs*. 2008;22(11):939-962. doi:10.2165/00023210-200822110-00004
54. Afonso P, Brissos S, Cañas F, Bobes J, Bernardo-Fernandez I. Treatment adherence and quality of sleep in schizophrenia outpatients. *Int J Psychiatry Clin Pract*. 2014;18(1):70-76. doi:10.3109/13651501.2013.845219
55. Benasi G, Fava GA, Guidi J. Prodromal Symptoms in Depression: A Systematic Review. *PPS*. 2021;90(6):365-372. doi:10.1159/000517953
56. Radua J, Ramella-Cravaro V, Ioannidis JPA, et al. What causes psychosis? An umbrella review of risk and protective factors. *World psychiatry: official journal of the World Psychiatric Association (WPA)*. 2018;17(1):49-66. doi:10.1002/wps.20490
57. Paquin V, Malla AK, Iyer SN, Lepage M, Joobor R, Shah JL. Combinations and Temporal Associations Among Precursor Symptoms Before a First Episode of Psychosis. *Schizophrenia Bulletin*. Published online October 20, 2023:sbad152. doi:10.1093/schbul/sbad152
58. Salazar de Pablo G, Estradé A, Cutroni M, Andlauer O, Fusar-Poli P. Establishing a clinical service to prevent psychosis: What, how and when? Systematic review. *Transl Psychiatry*. 2021;11(1):1-14. doi:10.1038/s41398-020-01165-x

**Figure 1.** Study design. The look-back period was split into six three-month follow-up intervals (FU 1-6) relative to the index date (T-0mo) of SMD diagnosis. This pipeline (steps 1-4) was followed for both the primary analysis (SMD model) and secondary analysis (sub-networks).

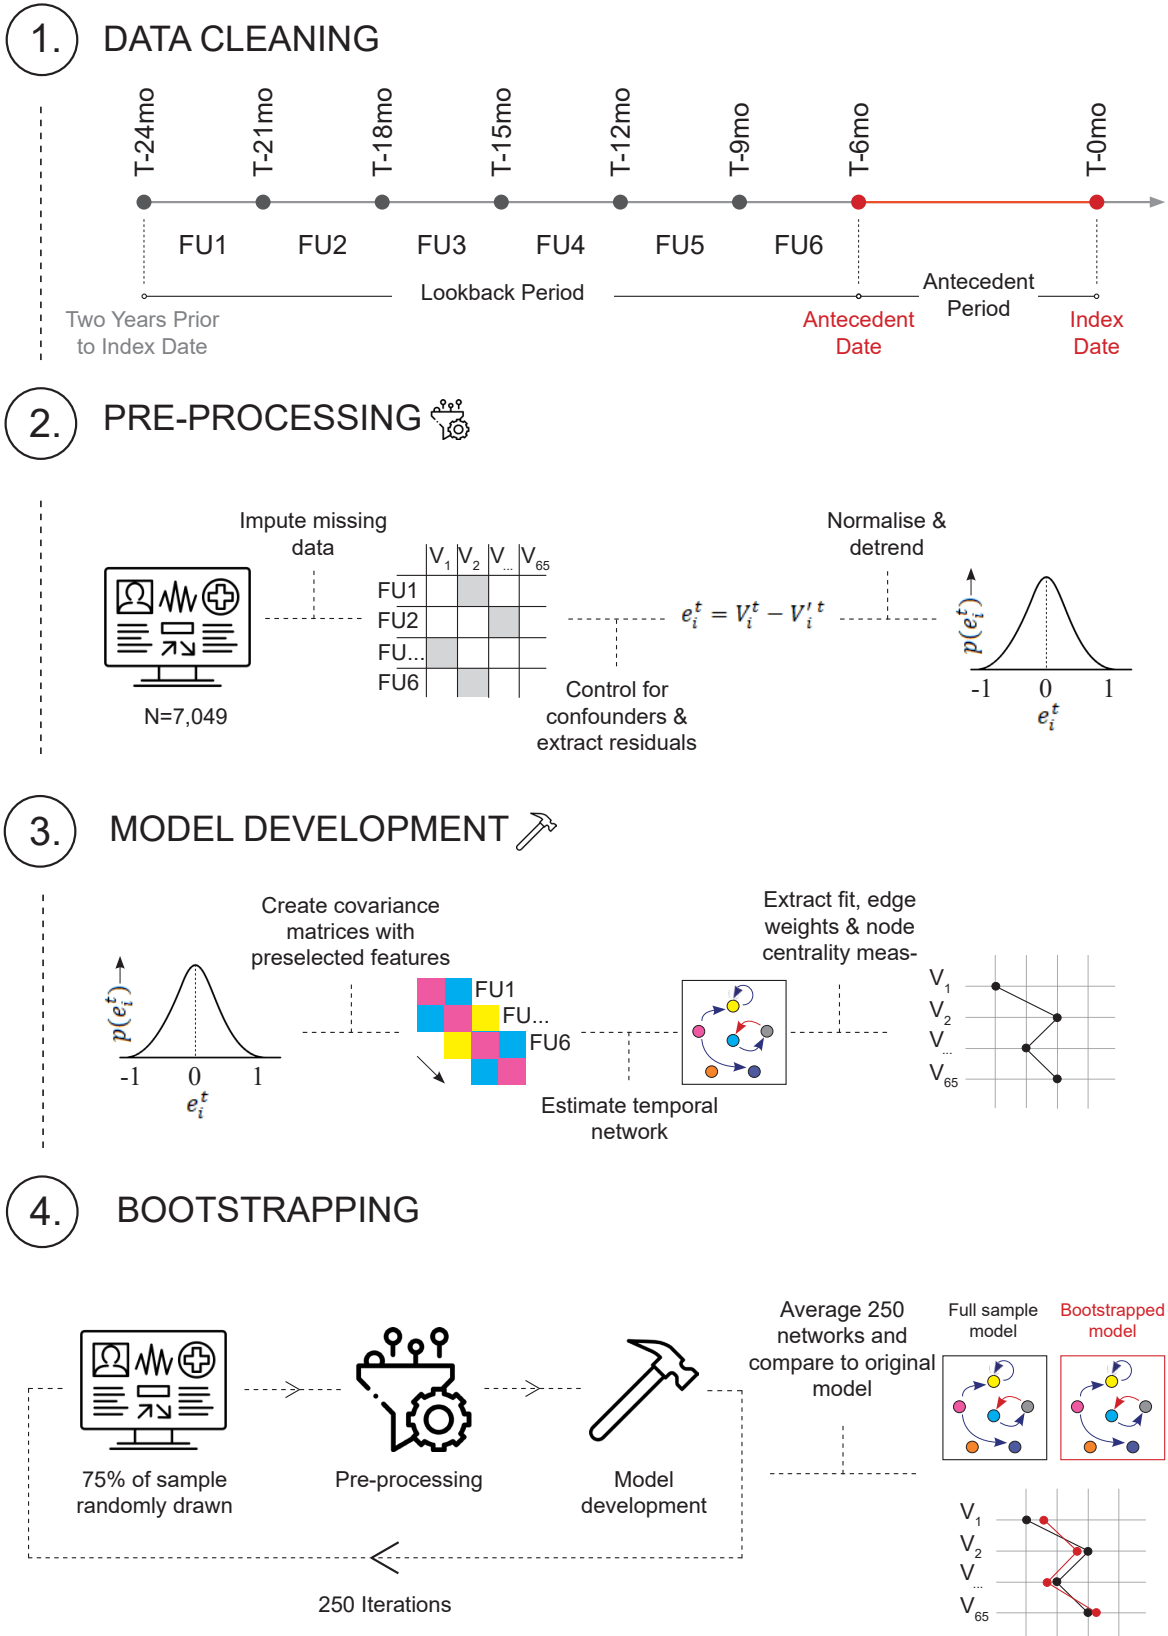

**Figure 2.** Temporal relationships between nodes in SMD network

**A.** Temporal network graph displaying positive (blue) and negative (red) relationships between nodes from actual model estimates. Edges are displayed as lines, with the thickness representing the strength of the edge weight estimate (correlation coefficient,  $z$ ). Edges are thresholded ( $|z| > .022$ ) and labelled ( $|z| > .03$ ). For visualisation purposes, nodes are clustered into six categories (depressive, manic, negative, positive, substance use and other) according to the type of prodromal feature.

**B.** Bootstrapped (250 repetitions; black) vs actual model (n=7,140; red) edge weight estimates ( $|z| > .022$ ). Edges are directed such that “node1 – node2” represent the edge from node1 to edge2. All edges were positive except the one marked with an asterisk (HOST-INS).

**C.** Centrality measures for all nodes

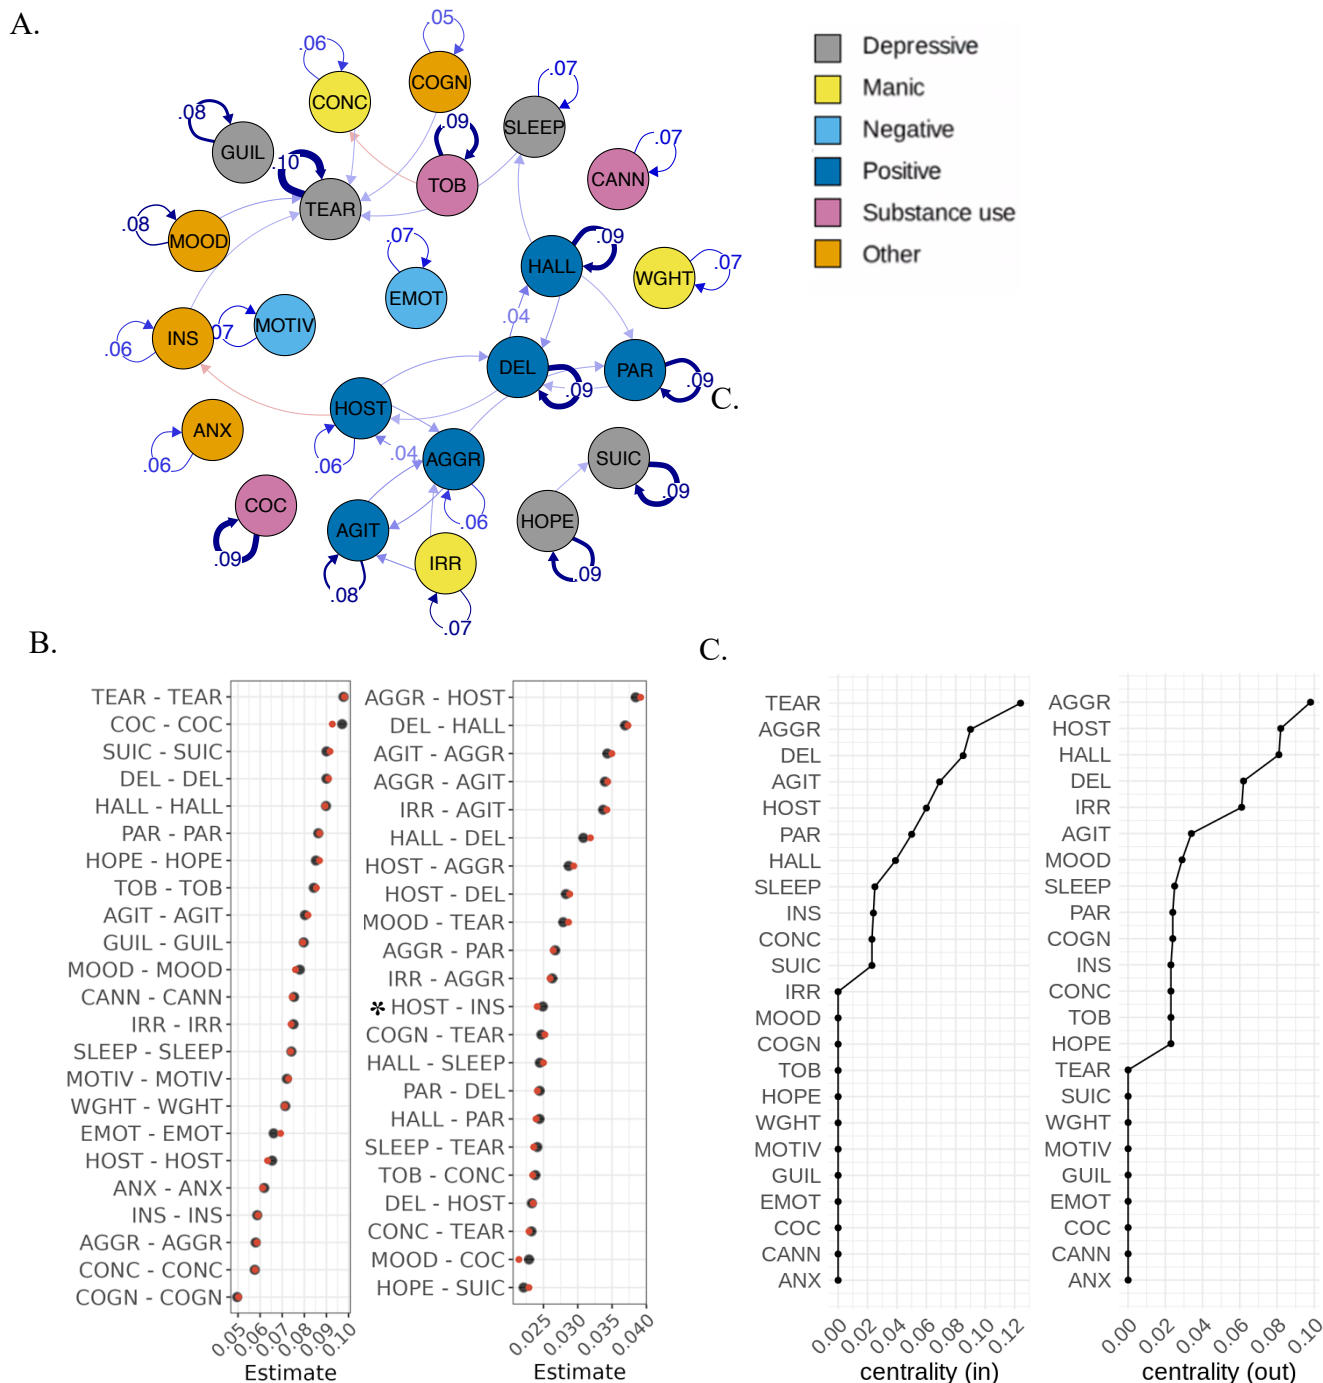

AGGR: aggression, AGIT: agitation, ANX: anxiety, CANN: cannabis use, COC: cocaine use, COGN: cognitive impairment, CONC: poor concentration, DEL: delusional thinking, EMOT: emotional withdrawal, GUIL: guilt, HALL: hallucinations (all), HOPE: feeling hopeless, HOST: hostility, INS: poor insight, IRR: irritability, MOOD: mood instability, MOTIV: poor motivation, PAR: paranoia, SLEEP: disturbed sleep, SUIC: suicidality, TEAR: tearfulness, TOB: tobacco use, WGHT: weight loss



**Figure 3** Temporal relationships between nodes in sub-networks

Temporal network graphs displaying positive (blue) and negative (red) relationships between nodes from actual model estimates for sub-networks (A. UMD, B. BMD, C. PSY). Edges are displayed as lines, with the thickness representing the strength of the edge weight estimate (correlation coefficient,  $\zeta$ ). Edges are thresholded (UMD:  $|\zeta| > .026$ , BMD:  $|\zeta| > .045$ , PSY:  $|\zeta| > .03$ ) and labelled (UMD:  $|\zeta| > .04$ , BMD:  $|\zeta| > .06$ , PSY:  $|\zeta| > .05$ ). For visualisation purposes, nodes are clustered into six categories (depressive, manic, negative, positive, substance use and other) according to the type of prodromal feature. D. Centrality measures for all nodes in sub-networks (green: UMD, blue: BMD, red: PSY)

A. UMD

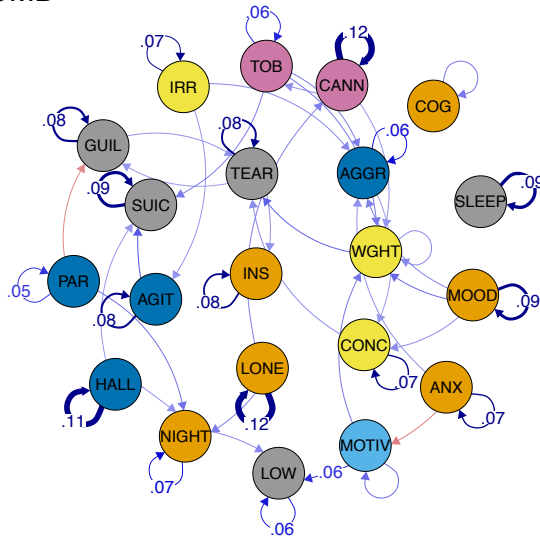

B. BMD

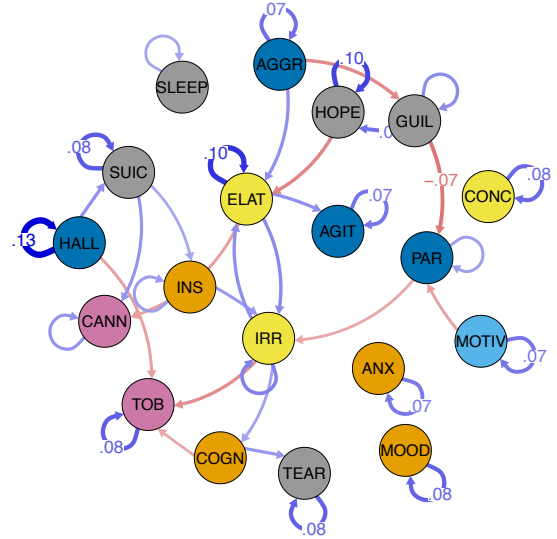

C. PSY

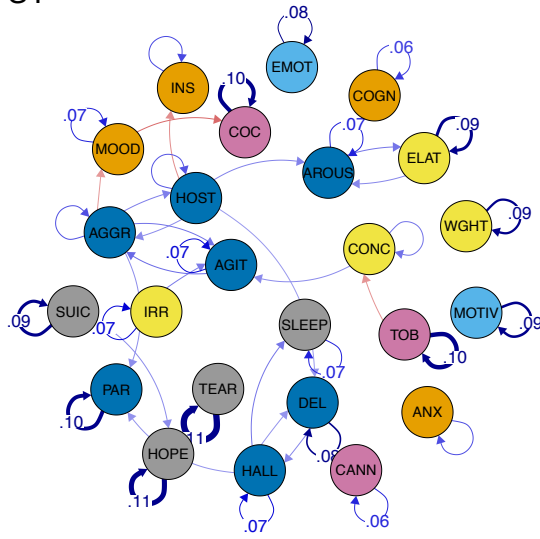

|              |                 |
|--------------|-----------------|
| ■ Depressive | ■ Positive      |
| ■ Manic      | ■ Substance use |
| ■ Negative   | ■ Other         |

D.

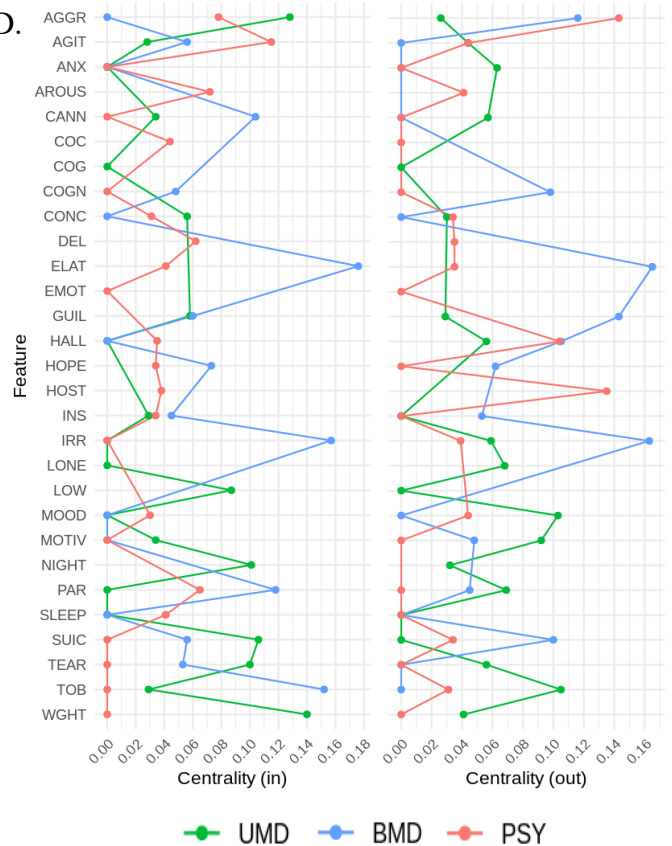

AGGR: aggression, AGIT: agitation, ANX: anxiety, AROUS: arousal, CANN: cannabis use, COC: cocaine use, COGN: cognitive impairment, CONC: poor concentration, DEL: delusional thinking, ELAT: elation, EMOT: emotional withdrawal, GUIL: guilt, HALL: hallucinations (all), HOPE: feeling hopeless, HOST: hostility, INS: poor insight, IRR: irritability, LONE: feeling lonely, LOW: low energy, MOOD: mood instability, MOTIV: poor motivation, NIGHT: nightmares, PAR: paranoia, SLEEP: disturbed sleep, SUIC: suicidality, TEAR: tearfulness, TOB: tobacco use, WGHT: weight loss



**Figure 4. Heatmaps of node-node covariance across communities.** The colour scale indicates the probability of 2 nodes occurring within the same community across 1000 iterations of Spin class algorithm (spin restricted to 12 [SMD] and 8 [UMD, BMD, PSY]). The nodes are ordered by hierarchical clustering. The 3 most-occurring communities are displayed under each heatmap, with their % occurrence across 1000 iterations. Edges have been thresholded at  $|z| > 0.01$  (SMD) and  $|z| > 0.015$  (UMD, BMD, PSY) for visualisation purposes. Positive edges are displayed in black, and negative edges in red.

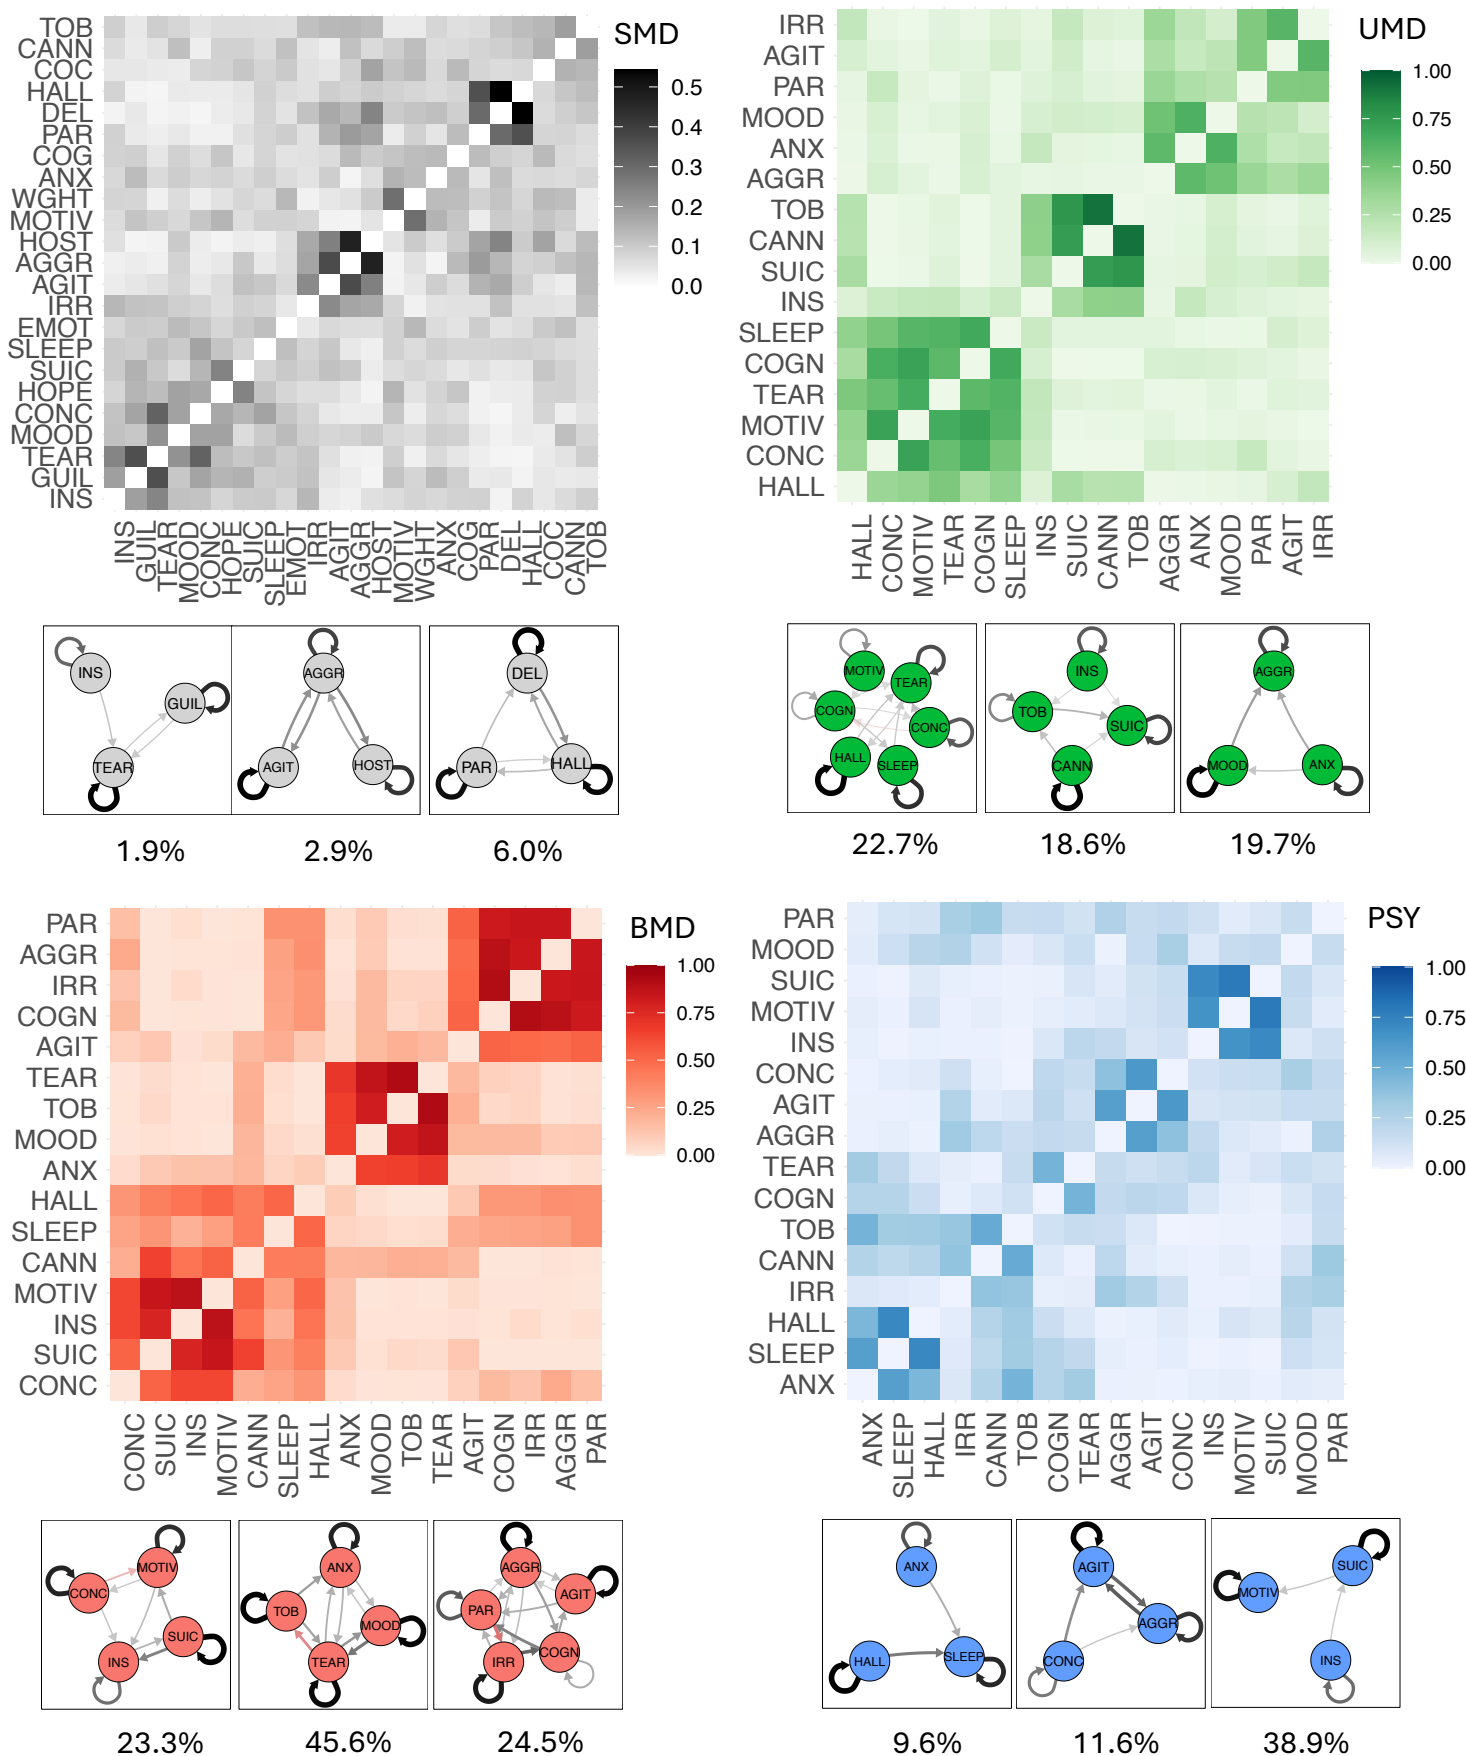

Source: https://medrxiv.org/content/medrxiv/early/2024/04/17/2024.03.08.24303965.full.pdf
